# Supplementary material
Source: publisher figshare collection journal article supplement (https://acs.figshare.com/ndownloader/files/17234444)
Supplement: Supplementary file 1 [file 17234444]

## Supporting Information

### Why the Reactive Oxygen Species of the Fenton Reaction Switches from Oxoiron(IV) Species to Hydroxyl Radical in Phosphate Buffer Solutions? A Computational Rationale

Hsing-Yin Chen

*Department of Medicinal and Applied Chemistry, Kaohsiung Medical University, Kaohsiung 80708, Taiwan*

E-mail: [hychen@kmu.edu.tw](mailto:hychen@kmu.edu.tw)

#### Table of Contents

- Page S2. Gas-phase electronic energy change of  $[\text{Fe}^{\text{II}}\text{H}_2\text{O}]^{2+} + \text{H}_2\text{PO}_4^- \rightarrow [\text{Fe}^{\text{II}}\text{H}_2\text{PO}_4]^+ + \text{H}_2\text{O}$ .
- Page S2. Hydration energies of  $\text{H}_2\text{O}$  and  $\text{H}_2\text{PO}_4^-$ .
- Page S3. Free energy change of successive  $\text{H}_2\text{O}$  exchange by  $\text{H}_2\text{PO}_4^-$  for  $[\text{Fe}^{\text{II}}(\text{H}_2\text{O})_6]^{2+}$ .
- Page S4. Average bond distances and standard deviations for ADMP dynamics simulation of  $[\text{Fe}^{\text{II}}(\text{H}_2\text{PO}_4)_5(\text{H}_2\text{O})]^{3-}$ .
- Page S5. Calculated  $\langle S^2 \rangle$  values.
- Page S6–S7. ADMP dynamics simulations of  $[\text{Fe}^{\text{II}}(\text{H}_2\text{PO}_4)_5(\text{H}_2\text{O})]^{3-}$ .

Table S1. Gas-phase electronic energy change (kcal/mol) of  $[\text{Fe}^{\text{II}}\text{H}_2\text{O}]^{2+} + \text{H}_2\text{PO}_4^- \rightarrow [\text{Fe}^{\text{II}}\text{H}_2\text{PO}_4]^+ + \text{H}_2\text{O}$ .

| method              | $\Delta E$ |
|---------------------|------------|
| B3LYP-D3/6-31+G(d)  | -301.7     |
| PBE0-D3/6-31+G(d)   | -301.9     |
| M06-D3/6-31+G(d)    | -303.5     |
| PW6B95-D3/6-31+G(d) | -296.9     |
| PW6B95-D3/Def2-TZVP | -300.3     |
| PW6B95-D3/Def2-QZVP | -300.0     |
| BD(T)/Def2-TZVPP    | -293.4     |

Table S2. Hydration energies (kcal/mol) of  $\text{H}_2\text{O}$  and  $\text{H}_2\text{PO}_4^-$ . Signed errors are given in parentheses.<sup>a</sup>

| method                                   | $\text{H}_2\text{O}$ | $\text{H}_2\text{PO}_4^-$ |
|------------------------------------------|----------------------|---------------------------|
| SMD/PW6B95-D3/6-31+G(d) <sup>d</sup>     | -9.3 (-3.0)          | -76.9 (-8.9)              |
| IEF-PCM/PW6B95-D3/6-31+G(d) <sup>d</sup> | -5.4 (0.9)           | -67.1 (0.9)               |
| CPCM/PW6B95-D3/6-31+G(d) <sup>d</sup>    | -5.5 (0.8)           | -67.2 (0.8)               |
| Expt.                                    | -6.3                 | -68                       |

<sup>a</sup> Theoretical hydration energies were evaluated by the difference between solution-phase electronic energy and gas-phase electronic energy at solution-phase optimized geometry.

Table S3. Free energy change (kcal/mol) of successive H<sub>2</sub>O exchange by H<sub>2</sub>PO<sub>4</sub><sup>-</sup> for [Fe<sup>II</sup>(H<sub>2</sub>O)<sub>6</sub>]<sup>2+</sup>.<sup>a</sup>

| n | CPCM/PBE0/6-31+G(d) | SMD/PBE0/6-31+G(d) | CPCM/M06/6-31+G(d) | CPCM/PW6B95/6-31+G(d) | CPCM/PBE0/Def2-TZVP <sup>b</sup> | CPCM/PBE0/Def2-QZVP <sup>b</sup> |
|---|---------------------|--------------------|--------------------|-----------------------|----------------------------------|----------------------------------|
| 1 | -16.5               | -13.7              | -15.5              | -17.4                 | -18.1                            | -16.9                            |
| 2 | -14.8               | -12.9              | -14.6              | -15.2                 | -16.3                            | -15.4                            |
| 3 | -13.1               | -13.4              | -11.5              | -10.8                 | -16.4                            | -14.2                            |
| 4 | -11.8               | -13.3              | -11.0              | -13.6                 | -9.4                             | -7.5                             |
| 5 | -8.4                | -14.7              | -7.8               | -7.4                  | -9.2                             | -8.8                             |
| 6 | -6.0                | -8.0               | -5.4               | -4.1                  | -5.9                             | -5.3                             |

<sup>a</sup> Grimme's D3 dispersion correction was included and experimental hydration energies of H<sub>2</sub>O and H<sub>2</sub>PO<sub>4</sub><sup>-</sup> were employed in all calculations.

<sup>b</sup> CPCM/PBE0/6-31+G(d) optimized geometries are used.

Table S4. Average bond distances and standard deviations (Å)

| bond label <sup>a</sup> | bond distance | standard deviation |
|-------------------------|---------------|--------------------|
| FeL <sub>1</sub>        | 2.339         | 0.144              |
| FeL <sub>2</sub>        | 2.228         | 0.109              |
| FeL <sub>3</sub>        | 2.131         | 0.097              |
| FeL <sub>4</sub>        | 2.212         | 0.130              |
| FeL <sub>5</sub>        | 2.031         | 0.069              |
| FeL <sub>6</sub>        | 2.071         | 0.087              |
| HB <sub>1</sub>         | 2.166         | 0.518              |
| HB <sub>2</sub>         | 1.883         | 0.168              |
| HB <sub>3</sub>         | 3.101         | 0.396              |
| HB <sub>4</sub>         | 1.783         | 0.184              |
| HB <sub>5</sub>         | 1.830         | 0.199              |
| HB <sub>6</sub>         | 1.799         | 0.142              |
| HB <sub>7</sub>         | 1.701         | 0.085              |
| HB <sub>8</sub>         | 1.735         | 0.145              |
| HB <sub>9</sub>         | 1.982         | 0.183              |

<sup>a</sup> See Figure 1 for bond label

Table S5. Calculated  $\langle S^2 \rangle$  values.

|                                                                                              | spin state | calculated $\langle S^2 \rangle$ | exact $\langle S^2 \rangle$ |
|----------------------------------------------------------------------------------------------|------------|----------------------------------|-----------------------------|
| $[\text{Fe}^{\text{II}}(\text{H}_2\text{O})_6]^{2+}$                                         | quintet    | 6.0046                           | 6.0000                      |
| $[\text{Fe}^{\text{II}}(\text{H}_2\text{PO}_4)(\text{H}_2\text{O})_5]^+$                     | quintet    | 6.0048                           | 6.0000                      |
| $[\text{Fe}^{\text{II}}(\text{H}_2\text{PO}_4)_2(\text{H}_2\text{O})_4]$                     | quintet    | 6.0051                           | 6.0000                      |
| $[\text{Fe}^{\text{II}}(\text{H}_2\text{PO}_4)_3(\text{H}_2\text{O})_3]^-$                   | quintet    | 6.0050                           | 6.0000                      |
| $[\text{Fe}^{\text{II}}(\text{H}_2\text{PO}_4)_4(\text{H}_2\text{O})_2]^{2-}$                | quintet    | 6.0050                           | 6.0000                      |
| $[\text{Fe}^{\text{II}}(\text{H}_2\text{PO}_4)_5(\text{H}_2\text{O})]^{3-}$                  | quintet    | 6.0051                           | 6.0000                      |
| $[\text{Fe}^{\text{II}}(\text{H}_2\text{PO}_4)_6]^{4-}$                                      | quintet    | 6.0051                           | 6.0000                      |
| <b>RC</b>                                                                                    | quintet    | 6.0059                           | 6.0000                      |
| <b>INT1<sub>OH/•OH</sub></b>                                                                 | quintet    | 6.9681                           | 6.0000                      |
| <b>INT2<sub>OH/•OH</sub></b>                                                                 | quintet    | 7.0081                           | 6.0000                      |
| <b>INT<sub>FeIII+•OH</sub></b>                                                               | quintet    | 7.0080                           | 6.0000                      |
| <b>INT<sub>oxo</sub></b>                                                                     | quintet    | 6.1180                           | 6.0000                      |
| $[\text{Fe}^{\text{III}}(\text{H}_2\text{O})_6]^{3+}$                                        | sextet     | 8.7546                           | 8.7500                      |
| $[\text{Fe}^{\text{III}}(\text{H}_2\text{PO}_4)(\text{H}_2\text{O})_5]^{2+}$                 | sextet     | 8.7554                           | 8.7500                      |
| $[\text{Fe}^{\text{III}}(\text{H}_2\text{PO}_4)_2(\text{H}_2\text{O})_4]^+$                  | sextet     | 8.7556                           | 8.7500                      |
| $[\text{Fe}^{\text{III}}(\text{H}_2\text{PO}_4)_3(\text{H}_2\text{O})_3]$                    | sextet     | 8.7556                           | 8.7500                      |
| $[\text{Fe}^{\text{III}}(\text{H}_2\text{PO}_4)_4(\text{H}_2\text{O})_2]^-$                  | sextet     | 8.7560                           | 8.7500                      |
| $[\text{Fe}^{\text{III}}(\text{H}_2\text{PO}_4)_5(\text{H}_2\text{O})]^{2-}$                 | sextet     | 8.7559                           | 8.7500                      |
| $[\text{Fe}^{\text{III}}(\text{H}_2\text{PO}_4)(\text{OH})(\text{H}_2\text{O})_4]^+$         | sextet     | 8.7568                           | 8.7500                      |
| $[\text{Fe}^{\text{III}}(\text{H}_2\text{PO}_4)_2(\text{OH})(\text{H}_2\text{O})_3]$         | sextet     | 8.7562                           | 8.7500                      |
| $[\text{Fe}^{\text{III}}(\text{H}_2\text{PO}_4)_3(\text{OH})(\text{H}_2\text{O})_2]^-$       | sextet     | 8.7557                           | 8.7500                      |
| $[\text{Fe}^{\text{III}}(\text{H}_2\text{PO}_4)_4(\text{OH})(\text{H}_2\text{O})]^{2-}$      | sextet     | 8.7560                           | 8.7500                      |
| $[\text{Fe}^{\text{III}}(\text{H}_2\text{PO}_4)_5(\text{OH})]^{3-}$                          | sextet     | 8.7558                           | 8.7500                      |
| $[\text{Fe}^{\text{III}}(\text{HPO}_4)(\text{H}_2\text{O})_5]^+$                             | sextet     | 8.7571                           | 8.7500                      |
| $[\text{Fe}^{\text{III}}(\text{H}_2\text{PO}_4)(\text{HPO}_4)(\text{H}_2\text{O})_4]$        | sextet     | 8.7561                           | 8.7500                      |
| $[\text{Fe}^{\text{III}}(\text{H}_2\text{PO}_4)_2(\text{HPO}_4)(\text{H}_2\text{O})_3]^-$    | sextet     | 8.7558                           | 8.7500                      |
| $[\text{Fe}^{\text{III}}(\text{H}_2\text{PO}_4)_3(\text{HPO}_4)(\text{H}_2\text{O})_2]^{2-}$ | sextet     | 8.7560                           | 8.7500                      |
| $[\text{Fe}^{\text{III}}(\text{H}_2\text{PO}_4)_4(\text{HPO}_4)(\text{H}_2\text{O})]^{3-}$   | sextet     | 8.7556                           | 8.7500                      |

Spin contamination for every intermediate was examined. It was found that for most intermediates spin contamination problem is negligible, except for **INT1<sub>OH/•OH</sub>**, **INT2<sub>OH/•OH</sub>**, and **INT<sub>FeIII+•OH</sub>**, which exhibit a moderate spin contamination. For the three cases, the •OH is distant from the Fe(III) center and, thus, the spin coupling between •OH and five spins on Fe(III) is very weak. As a consequence, the anti-ferromagnetic coupling (quintet state) and ferromagnetic coupling (sextet state) of these intermediates are very close in energy, resulting in spin-state mixing.<sup>53</sup>

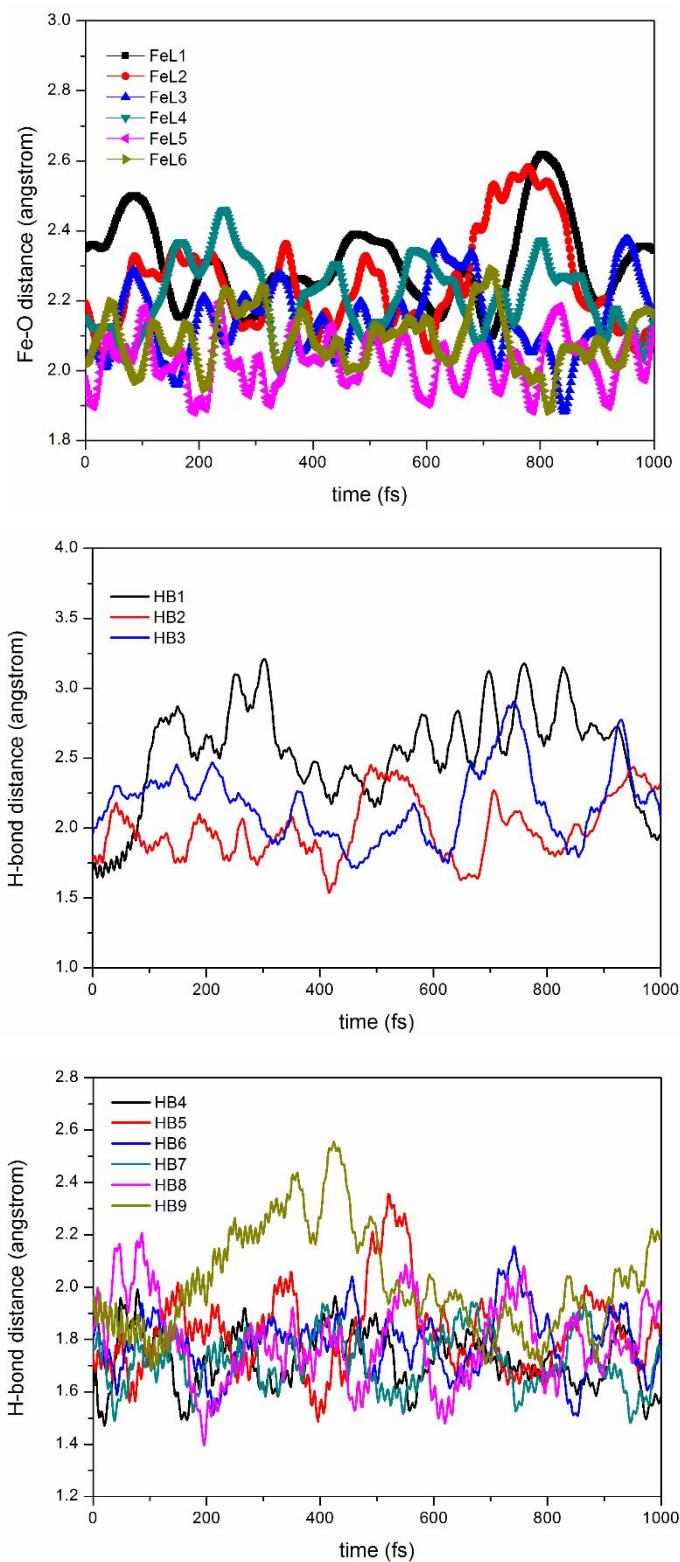

**Figure S1.** Time evolution of Fe-ligand and H-bond distances for trajectory 2. See Figure 1 for bond label.

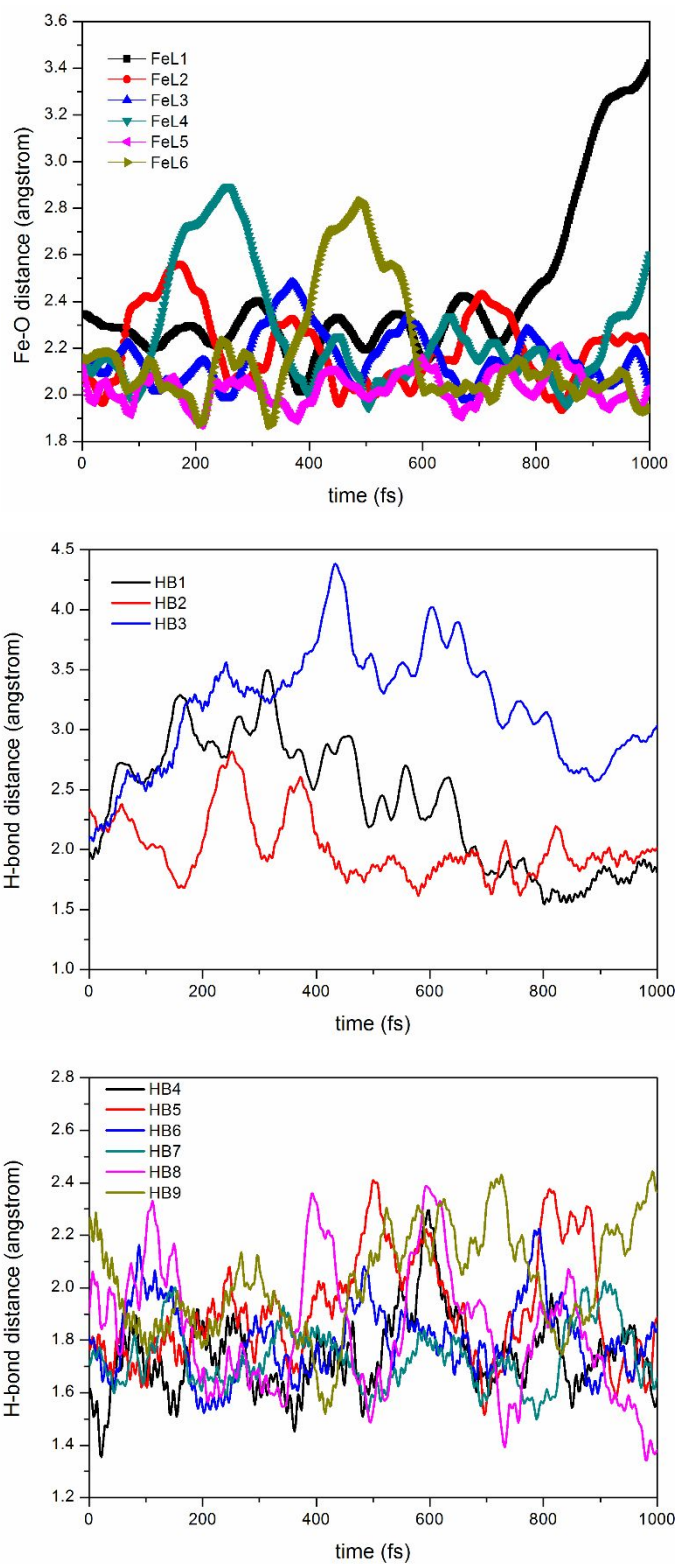

**Figure S2.** Time evolution of Fe-ligand and H-bond distances for trajectory 3. See Figure 1 for bond label.
